# Supplementary material for: Metagenomics and Quantitative Stable Isotope Probing Offer Insights into Metabolism of Polycyclic Aromatic Hydrocarbon Degraders in Chronically Polluted Seawater
Source: PubMed Central journal article supplement (PMC8125074; doi:10.1128/msystems.00245-21), 2021-05-11

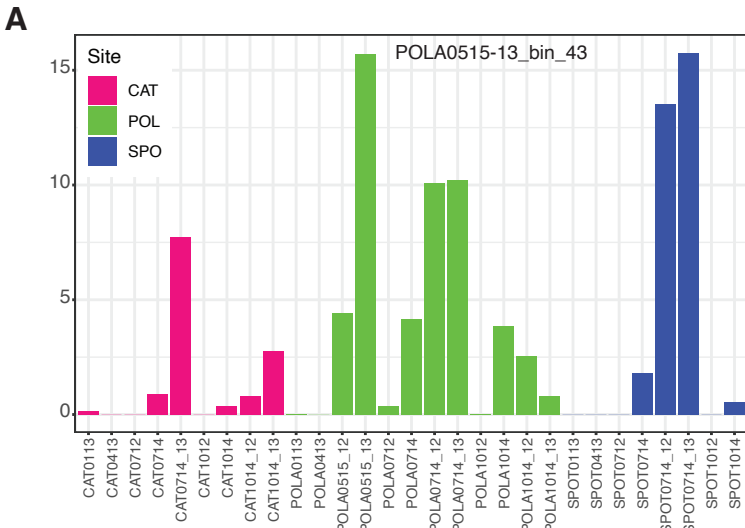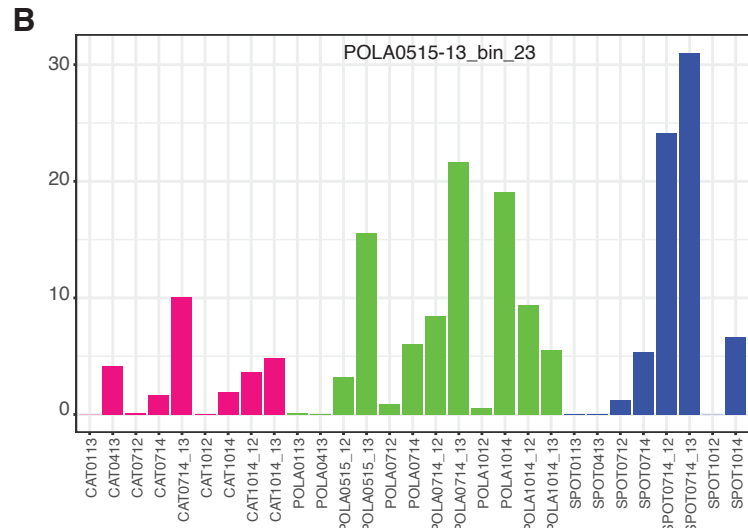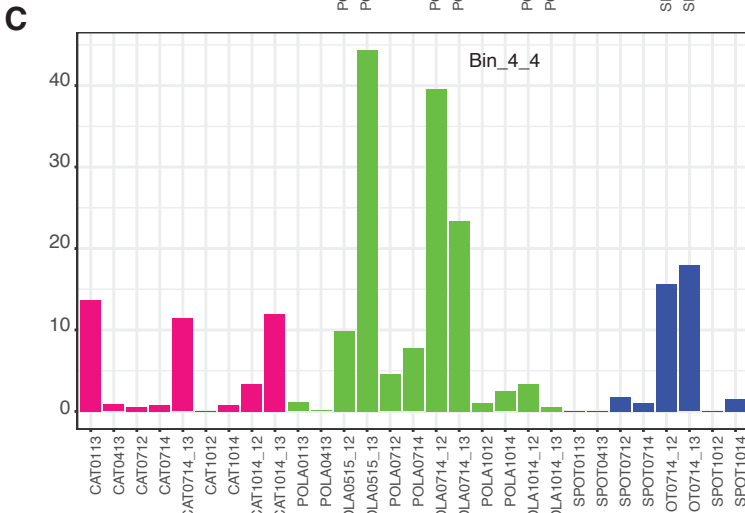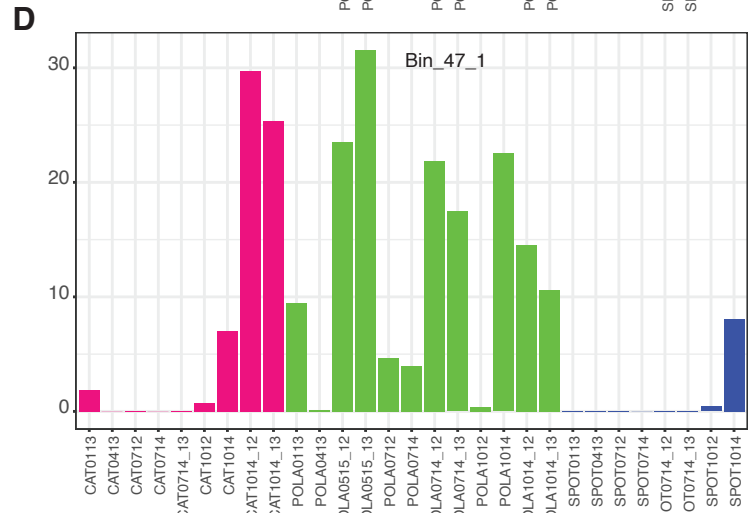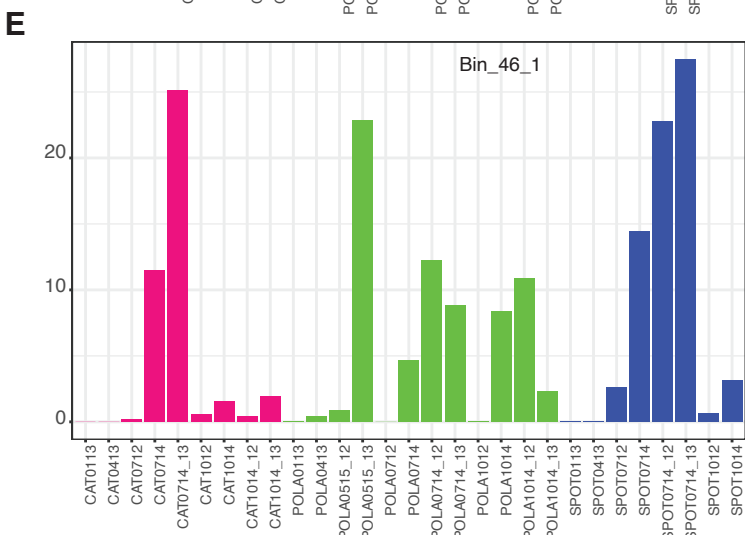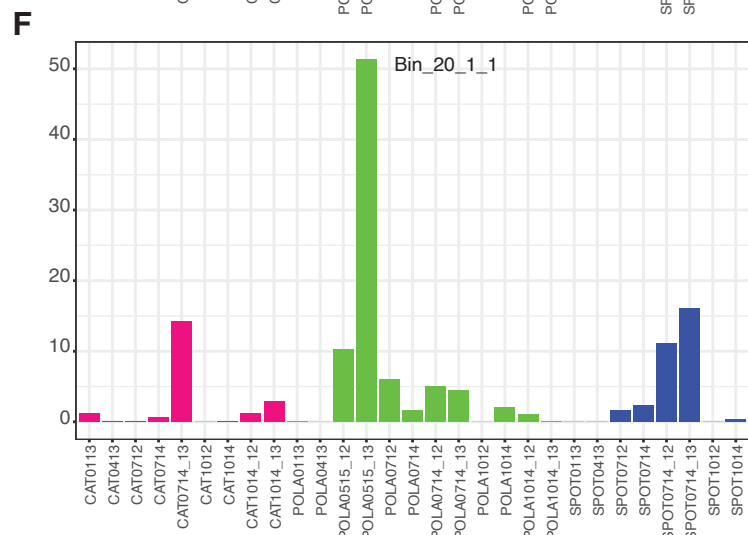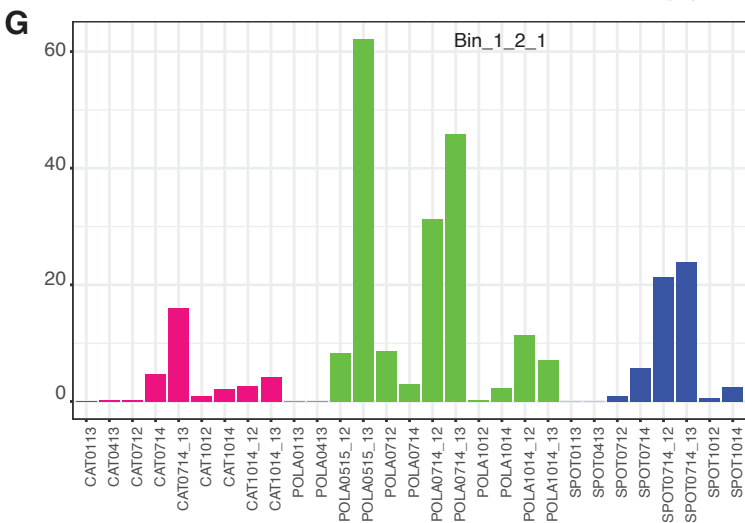

Supplement: mSystems.00245-21-sf003.pdf [file mSystems.00245-21-sf003.pdf]
